# Supplementary material for: Outdoor thermal comfort of university students and space design strategies for alleviation: A case study in Xi’an
Source: Research Square preprint supplement (doi:10.21203/rs.3.rs-7282226/v1), 2025-09-26

Appendix A Instruments installed at study sites.

**
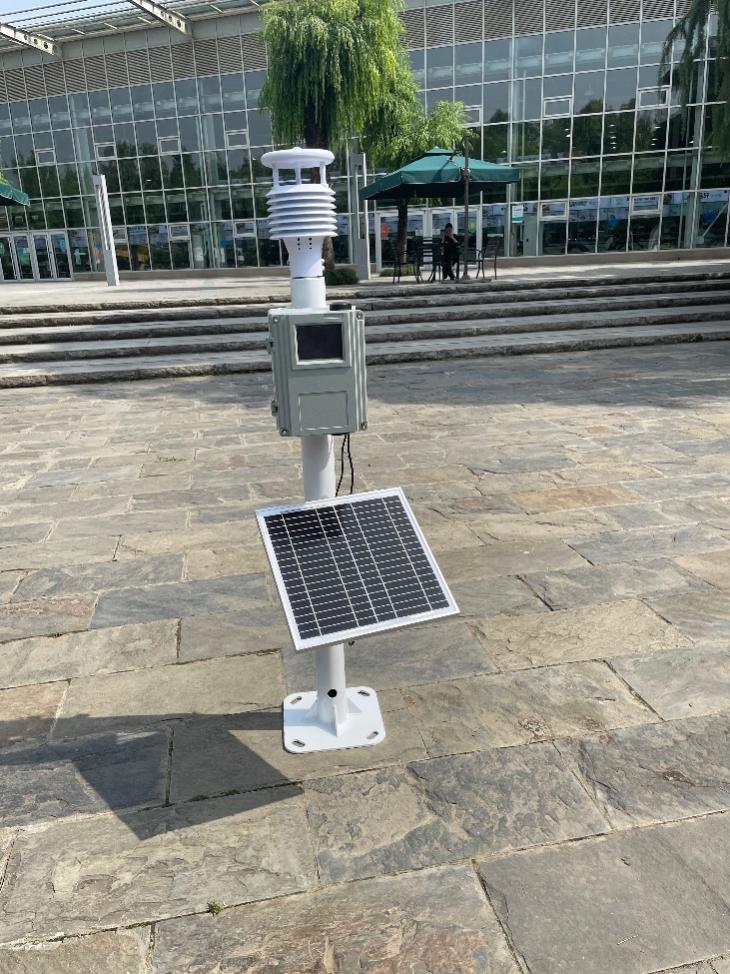
**

Appendix B Simplified garment checklist.


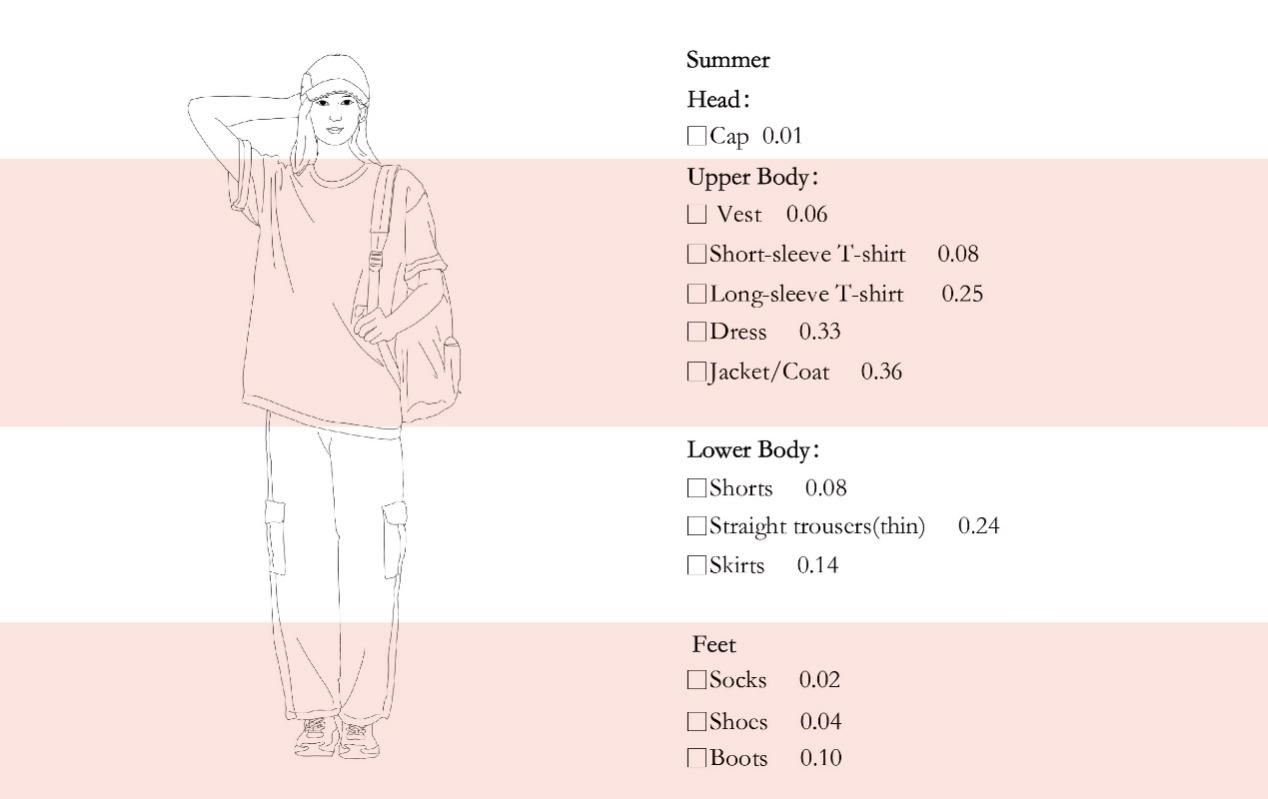


Appendix C Thermal comfort questionnaire (English translation from the original Chinese).


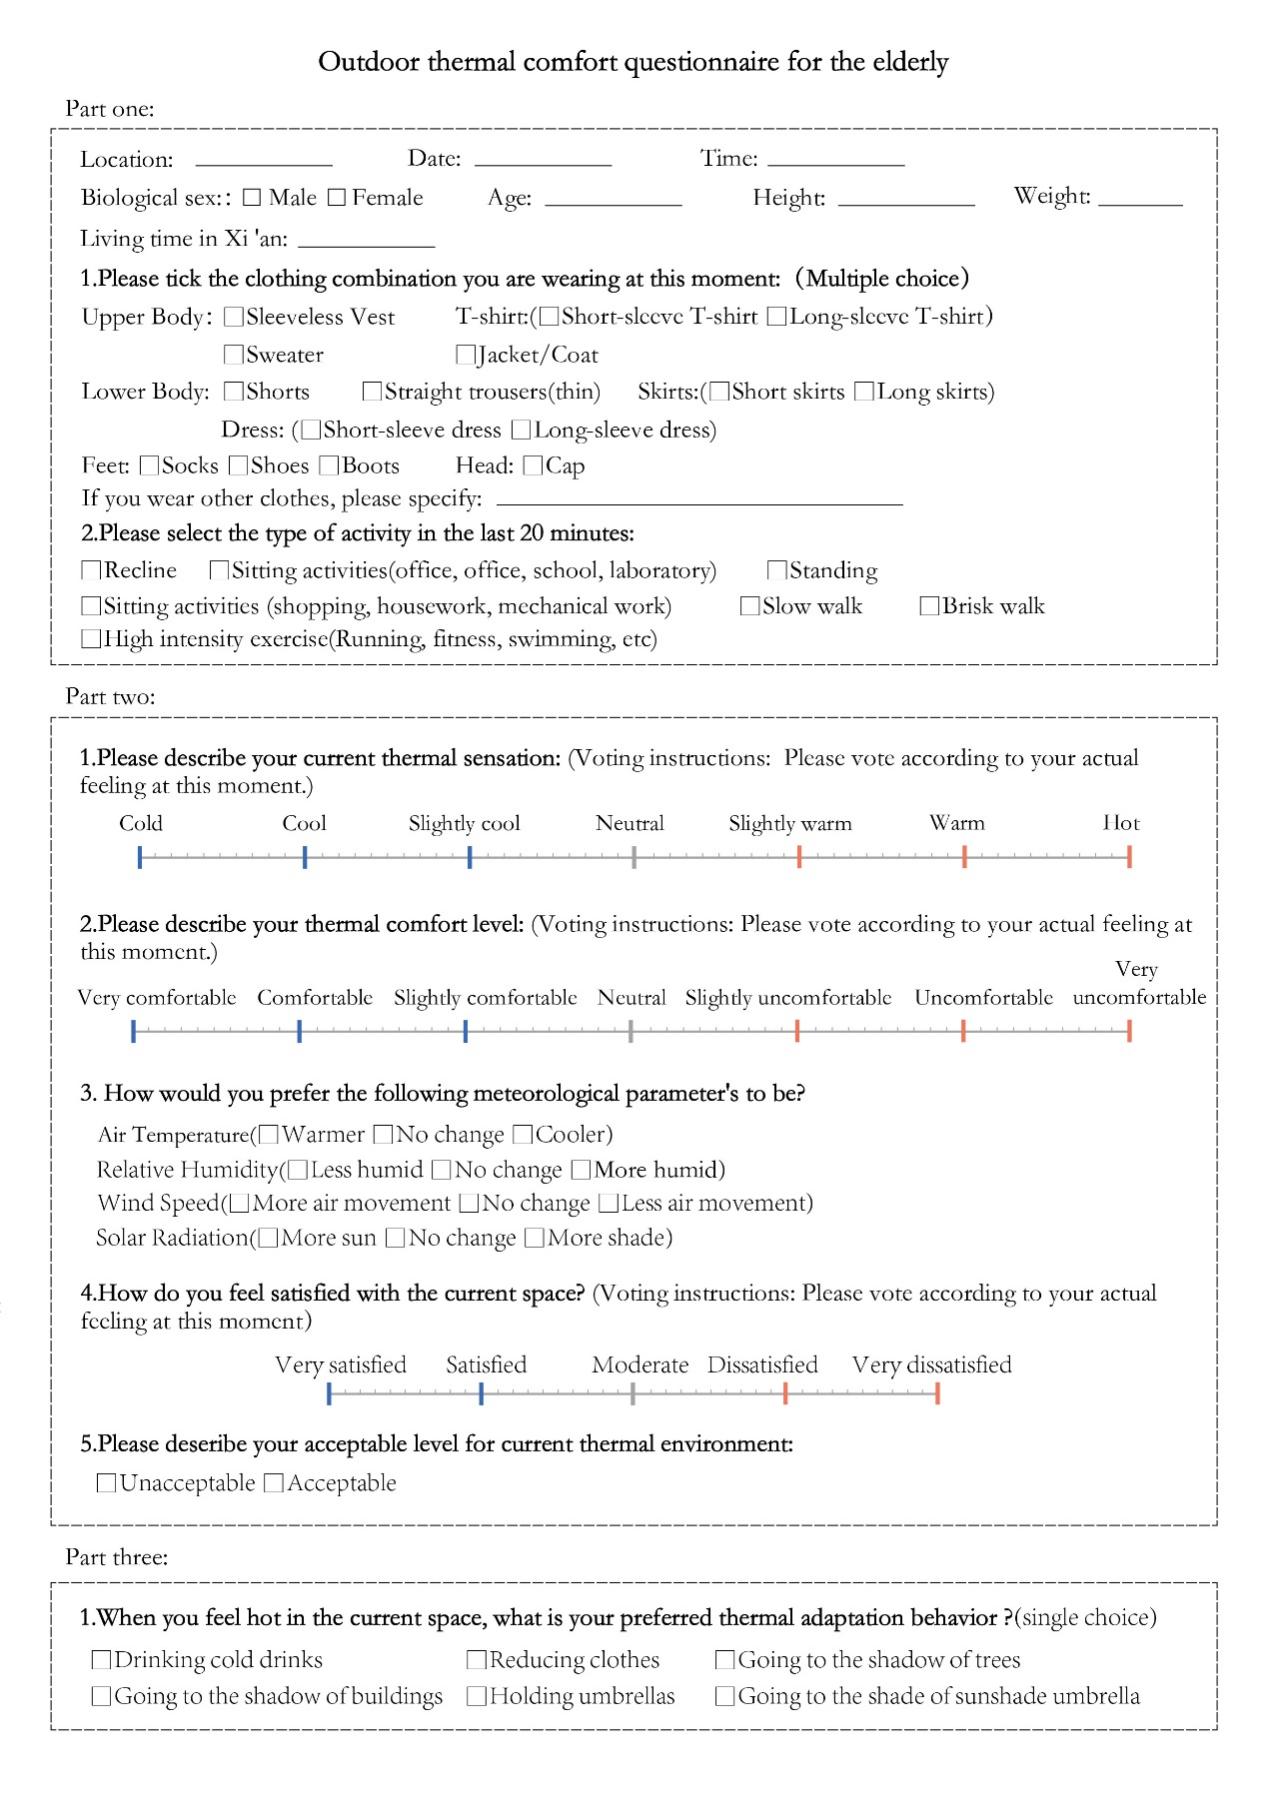

Supplement: Supplementary file 1 [file 553675035f2db74f62aadb83.docx]
